# Supplementary material for: Foot health education provision for people with rheumatoid arthritis–an online survey of UK podiatrists’ perceptions
Source: J Foot Ankle Res. 2016 Apr 26;9:13. doi: 10.1186/s13047-016-0145-6 (PMC4845353; doi:10.1186/s13047-016-0145-6)
Supplement: Additional file 1: — Practitioner Survey of FHE for people with RA. The file includes the survey questions and all raw data of the responses. (PDF 113 kb) [file 13047_2016_145_MOESM1_ESM.pdf]

# Rheumatoid Arthritis foot health education survey for practitioners

Showing 42 of 42 responses

Showing **all** responses

Showing **all** questions

## Section 1

**1** Are you

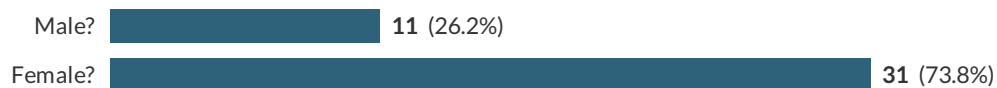

**2** What age range are you? please select one option from the list.

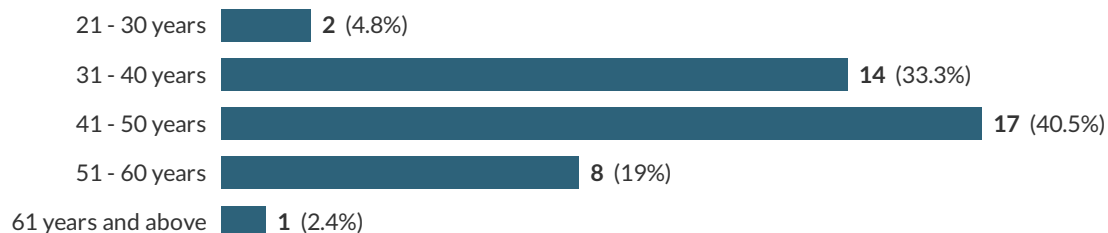

**3** Please select the length of time since you qualified as a podiatrist.

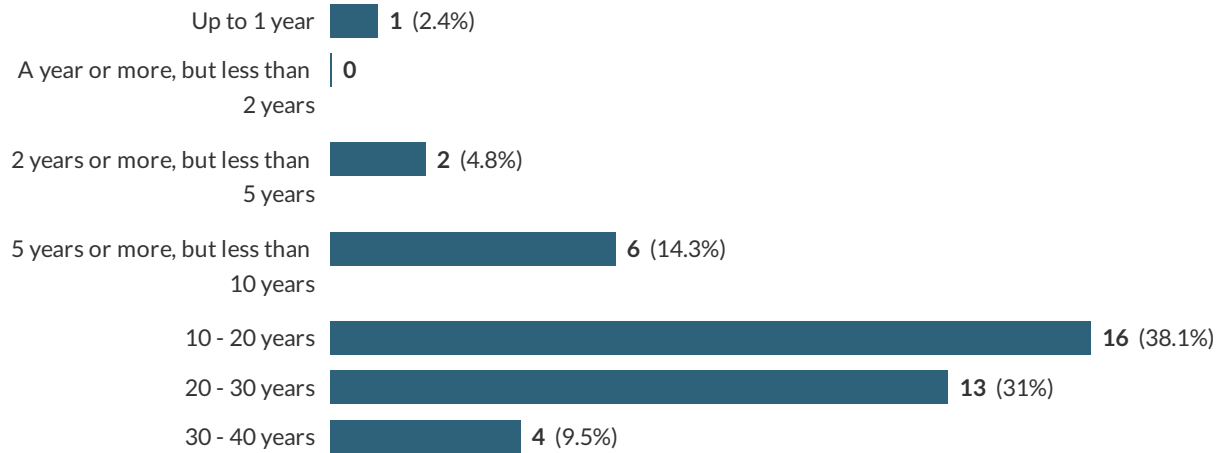

**4** Are you registered with the Health & Care Professions Council?

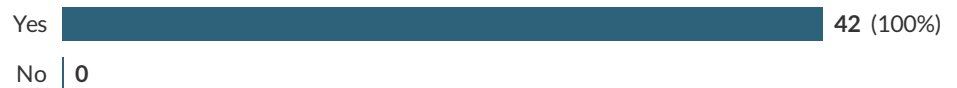

**5** Please select where you practice for the MAJORITY of the time.

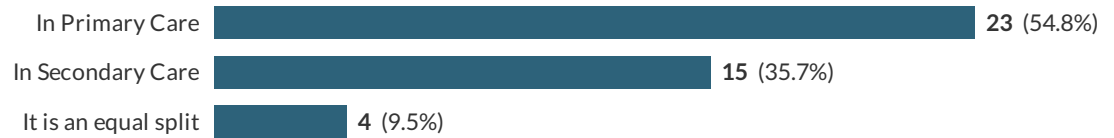

**6** Do you work in the UK or elsewhere?

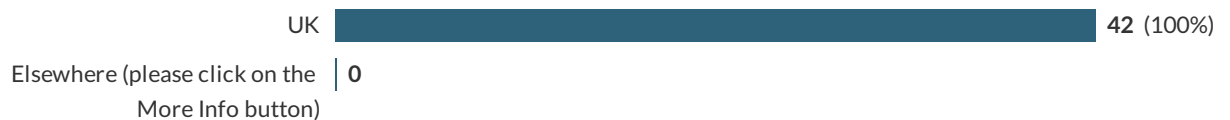

**7** Which UK geographic location do you work within? (select ONE area only)

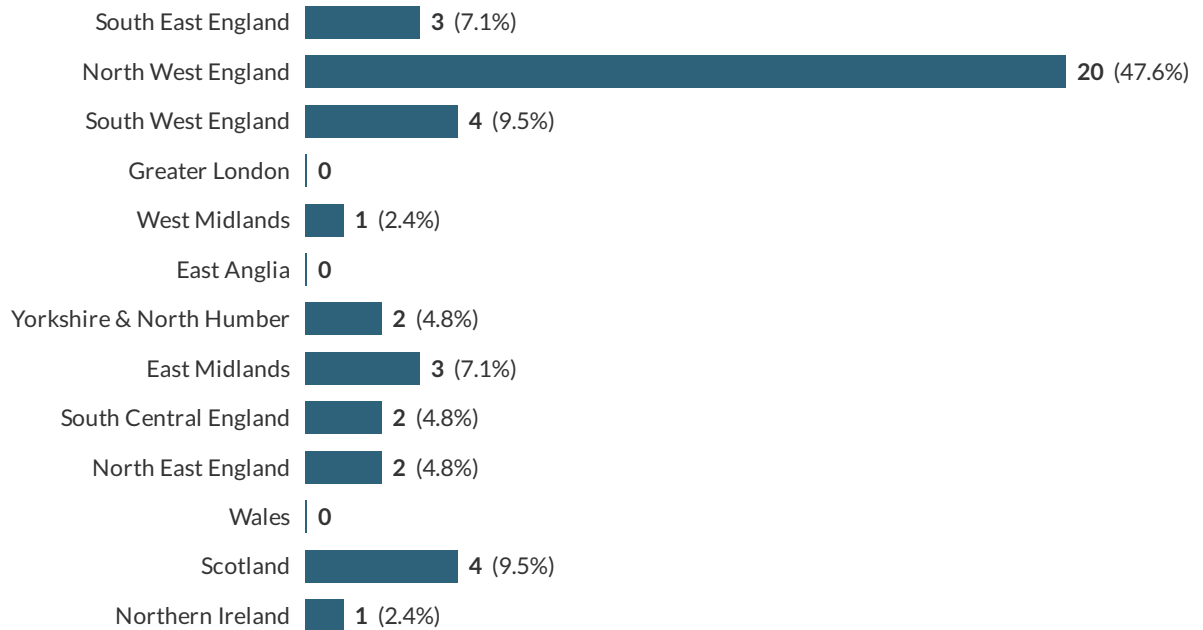

## Section 2: The aims of foot health education.

**8** To what extent do you agree with the following statements in relation to the AIMS of foot health education.

**8.1** To allow informed consent before treatment

**8.1.a** To allow informed consent before treatment - Select the level to which you agree for each statement

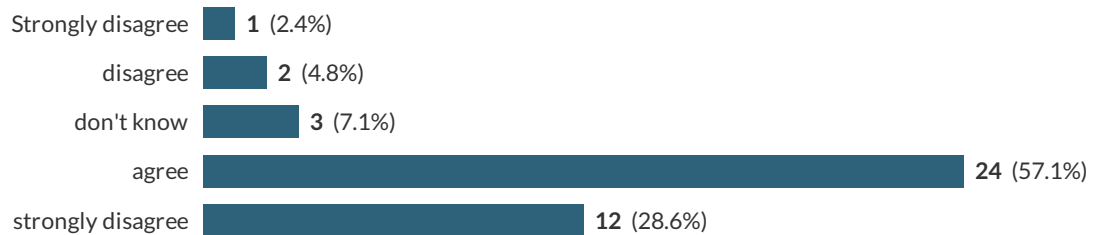

**8.2** To facilitate informed choices about their treatment options

**8.2.a** To facilitate informed choices about their treatment options - Select the level to which you agree for each statement

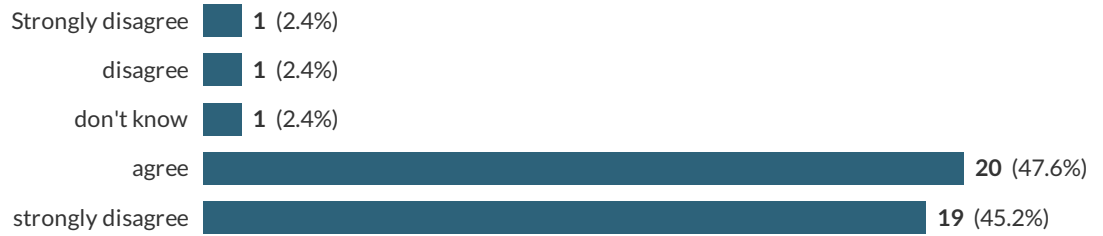

### 8.3 To enable them to manage their own foot health

#### 8.3.a To enable them to manage their own foot health - Select the level to which you agree for each statement

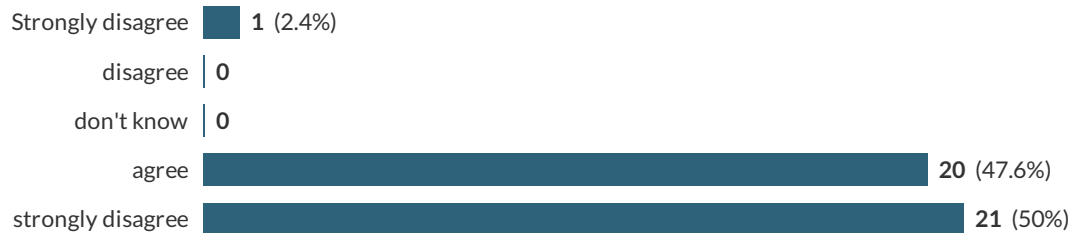

### 8.4 To educate them about how RA can affect their feet

#### 8.4.a To educate them about how RA can affect their feet - Select the level to which you agree for each statement

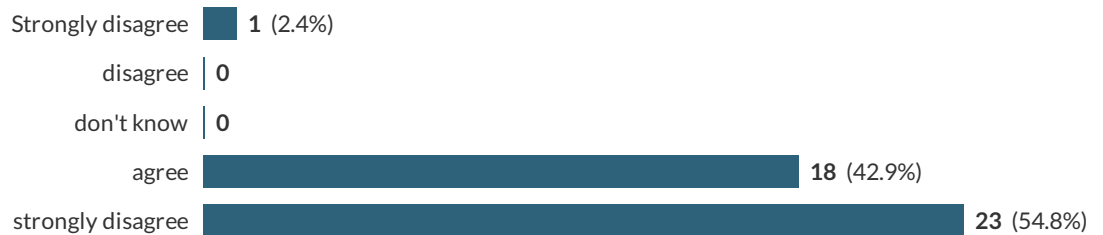

### 8.5 To inform them about information resources they can access

#### 8.5.a To inform them about information resources they can access - Select the level to which you agree for each statement

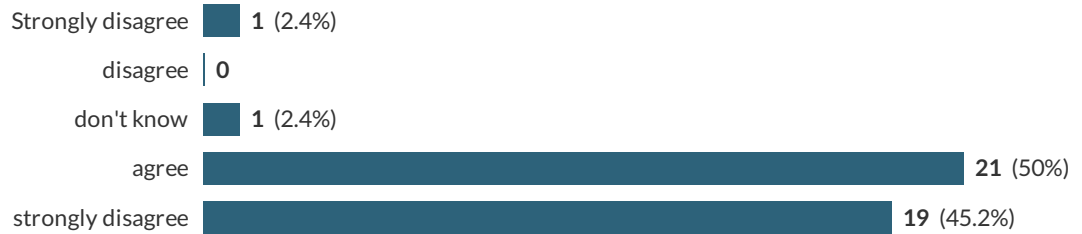

### Section 3: Methods of providing foot health education

9 Do you provide people with RA, foot health information/ education?

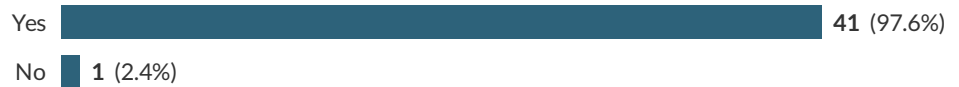

10 If you answered YES please indicate which types of information you have provided from the list below. Select all that apply. If NO, please move onto the next question.

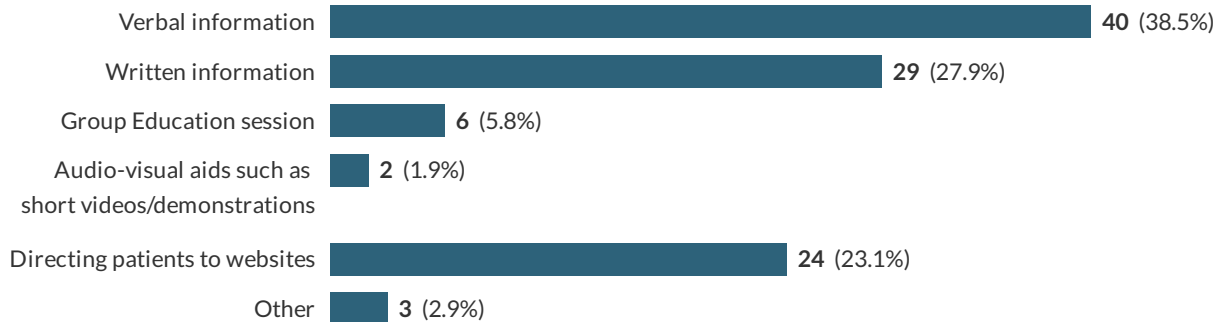

10.a If you selected Other, please specify:

| Showing all 3 responses                                                                                                                                      |                       |
|--------------------------------------------------------------------------------------------------------------------------------------------------------------|-----------------------|
| Weekly MDT clinic for newly diagnosed infl.arthritis shared with rheum. physio and rheum O.T. Used to hold group session but feedback better for this format | 120812-120806-6760694 |
| leaflets are available if needed                                                                                                                             | 120812-120806-6760696 |
| Examples of footwear in the clinic                                                                                                                           | 120812-120806-6760704 |

- 11 If you direct your patients to a foot health or disease-related website can you please select from the list below the ALL ones that you use. If there are websites we have not included, please list them in the txet box available.

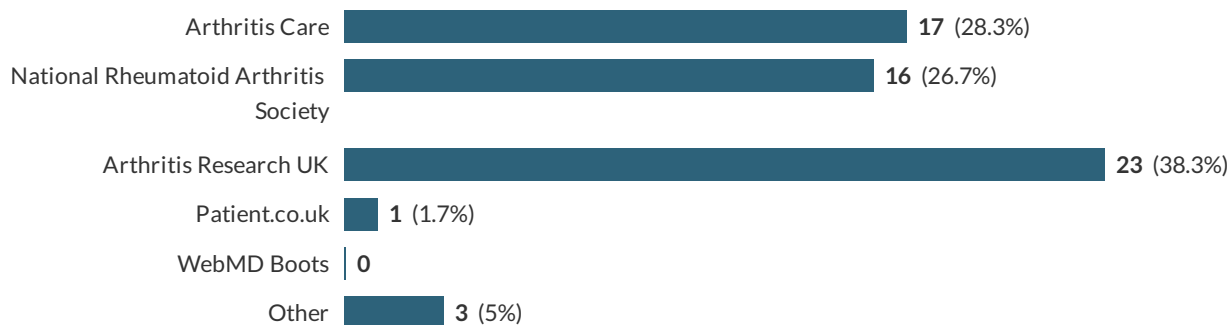

- 11.a If you selected Other, please specify:

| Showing all 3 responses                                     |                                       |
|-------------------------------------------------------------|---------------------------------------|
| Shoemed in Stratford.                                       | <a href="#">120812-120806-6760693</a> |
| Footwear related websites                                   | <a href="#">120812-120806-6760700</a> |
| make sure www sites use are pref "UK" and are 'mainstream'. | <a href="#">120812-120806-6760710</a> |

- 12 From the options given,to what extent do you think they are effective.

### 12.1 Verbal Information

- 12.1.a Verbal Information - Please select from Very Effective to Don't KNow

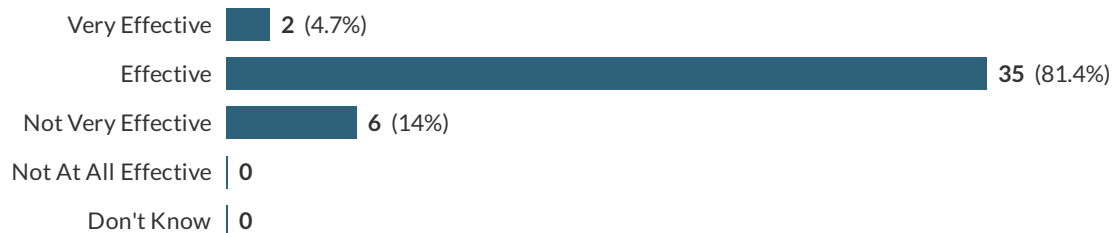

### 12.2 Written Information

- 12.2.a Written Information - Please select from Very Effective to Don't KNow

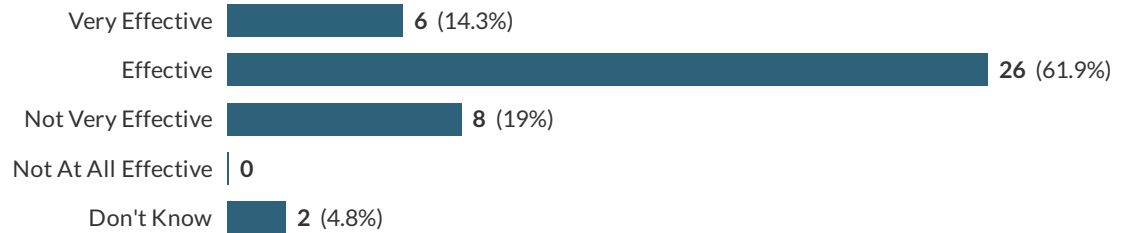

### 12.3 Group Education sessions

#### 12.3.a Group Education sessions - Please select from Very Effective to Don't KNow

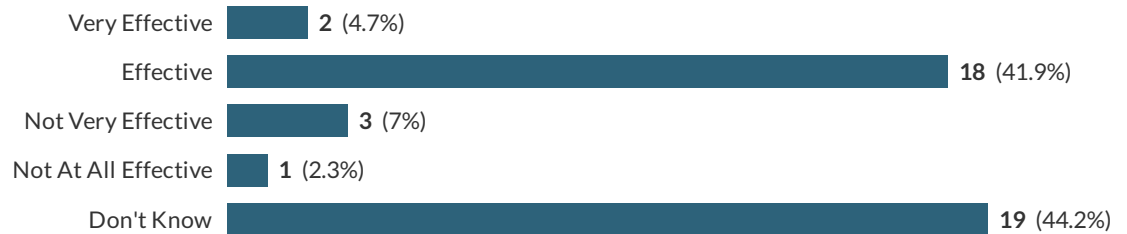

### 12.4 Audio-visual aids such as videos/demonstrations

#### 12.4.a Audio-visual aids such as videos/demonstrations - Please select from Very Effective to Don't KNow

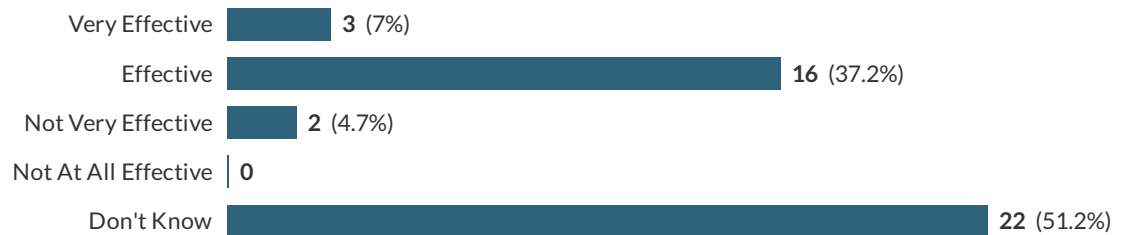

### 12.5 Web sites

#### 12.5.a Web sites - Please select from Very Effective to Don't KNow

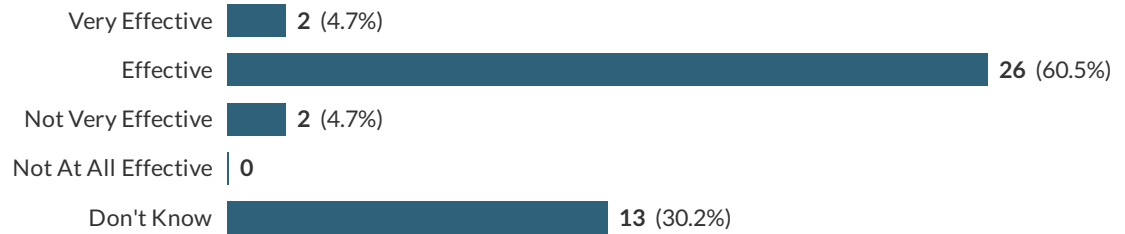

## 12.6 Combination of resources

### 12.6.a Combination of resources - Please select from Very Effective to Don't KNow

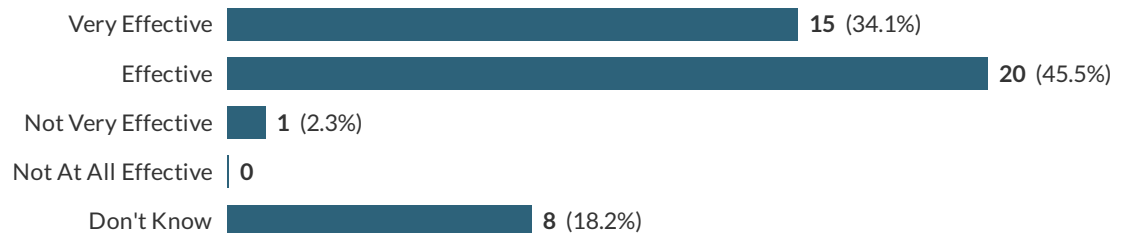

## 12.7 Other (in relation to additional methods you gave)

### 12.7.a Other (in relation to additional methods you gave) - Please select from Very Effective to Don't KNow

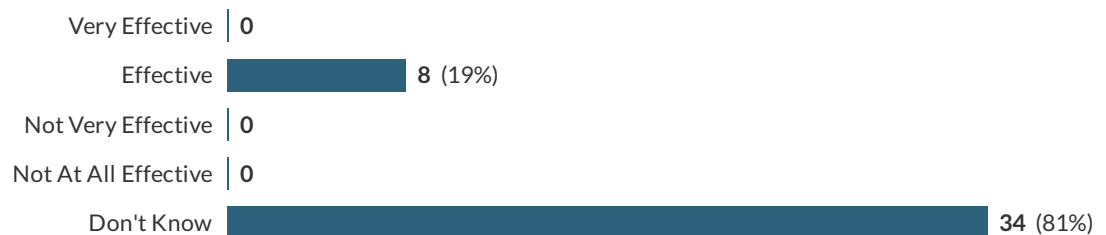

## Section 4: The content of foot health education

**13** To what extent do you think it is important for people with RA to know about the following areas of foot health education? Select from Very Important to Not Important for each item. They are in no particular order.

### 13.1 The role of the podiatrist in managing foot health

**13.1.a** The role of the podiatrist in managing foot health - Please select from Very Important to Not Important

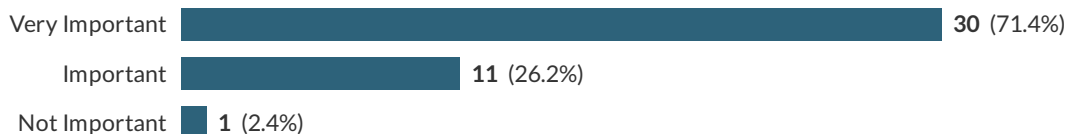

**13.2** General disease related information (e.g what is RA? Causes etc..)

**13.2.a** General disease related information (e.g what is RA? Causes etc..) - Please select from Very Important to Not Important

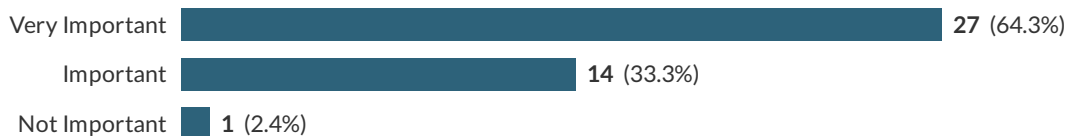

**13.3** Information relating to the medication taken for RA and how it can affect the feet

**13.3.a** Information relating to the medication taken for RA and how it can affect the feet - Please select from Very Important to Not Important

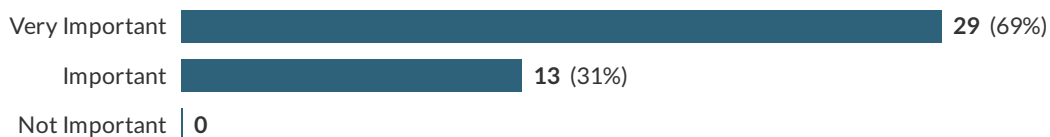

**13.4** Signs and symptoms of foot problems related to RA

**13.4.a** Signs and symptoms of foot problems related to RA - Please select from Very Important to Not Important

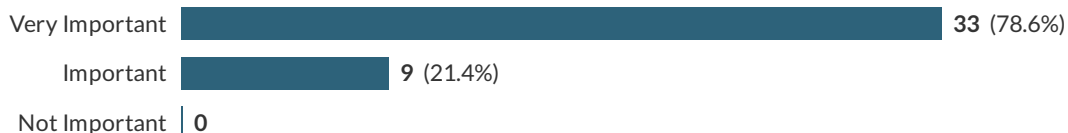

---

13.5 Contact details for podiatry services (when its an emergency, how and who to contact)

---

13.5.a Contact details for podiatry services (when its an emergency, how and who to contact) - Please select from Very Important to Not Important

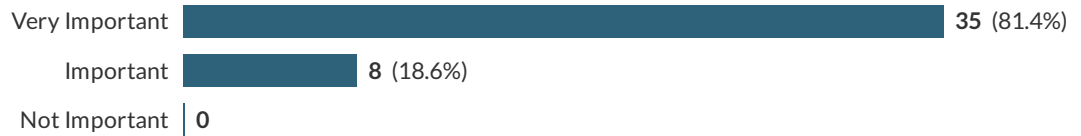

---

13.6 Management options relating to foot health

---

13.6.a Management options relating to foot health - Please select from Very Important to Not Important

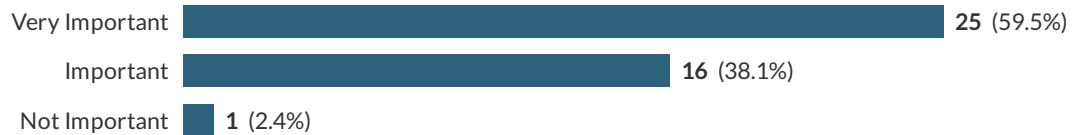

---

13.7 How to manage their own foot health (footwear advice, safe nail cutting practice, use of moisturiser..)

---

13.7.a How to manage their own foot health (footwear advice, safe nail cutting practice, use of moisturiser..) - Please select from Very Important to Not Important

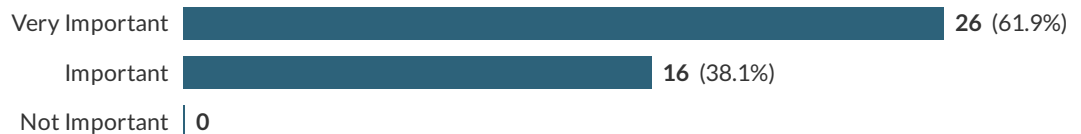

---

13.8 The consequences of not looking after their feet

---

13.8.a The consequences of not looking after their feet - Please select from Very Important to Not Important

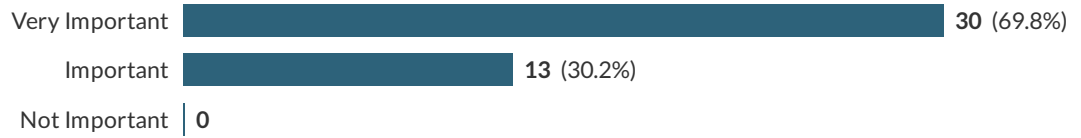

### 13.9 The role of other professions in managing foot health

#### 13.9.a The role of other professions in managing foot health - Please select from Very Important to Not Important

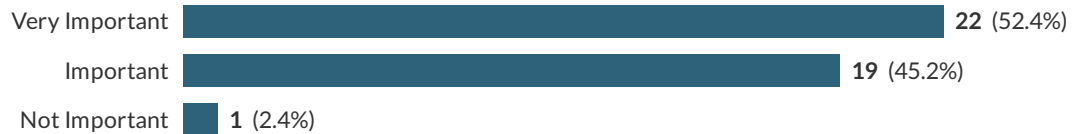

### 13.10 Information relating to Patient support groups/resources such as websites (e.g NRAS, Arthritis Care)

#### 13.10.a Information relating to Patient support groups/resources such as websites (e.g NRAS, Arthritis Care) - Please select from Very Important to Not Important

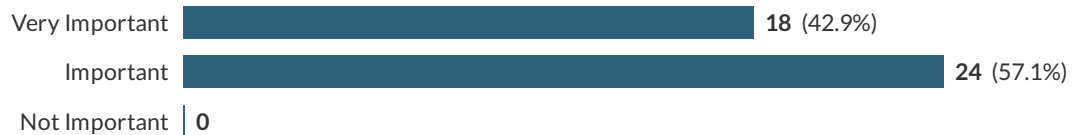

## Section 5: The timing of foot health education

### 14 To what extent do you agree with the following statements in relation to the timing of foot health education provision.

#### 14.1 Foot health education should be provided at the point of diagnosis of RA

##### 14.1.a Foot health education should be provided at the point of diagnosis of RA - To what extent do you agree with the following statements

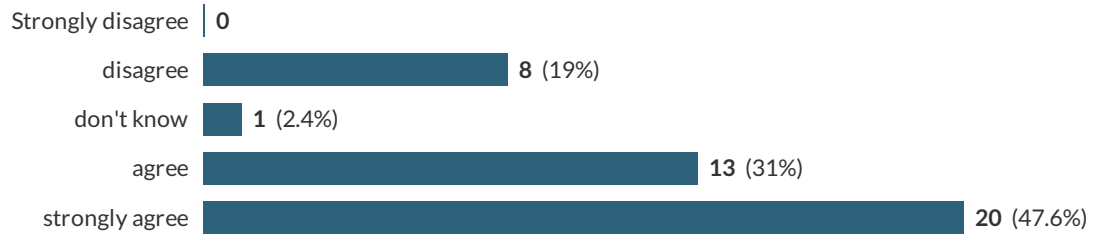

14.2 Foot health education should be provided only when you are asked for it

14.2.a Foot health education should be provided only when you are asked for it - To what extent do you agree with the following statements

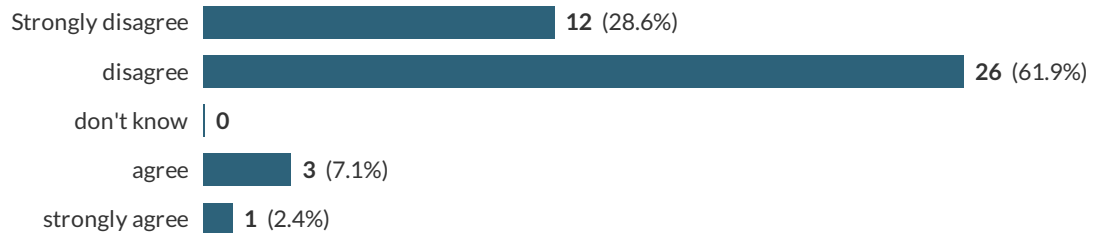

14.3 Foot health education should be provided when/if the person develops foot related symptoms

14.3.a Foot health education should be provided when/if the person develops foot related symptoms - To what extent do you agree with the following statements

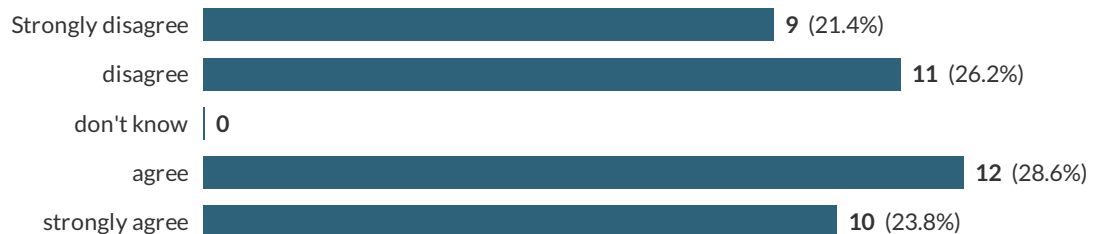

14.4 Foot health education should be provided at every available opportunity

14.4.a Foot health education should be provided at every available opportunity - To what extent do you agree with the following statements

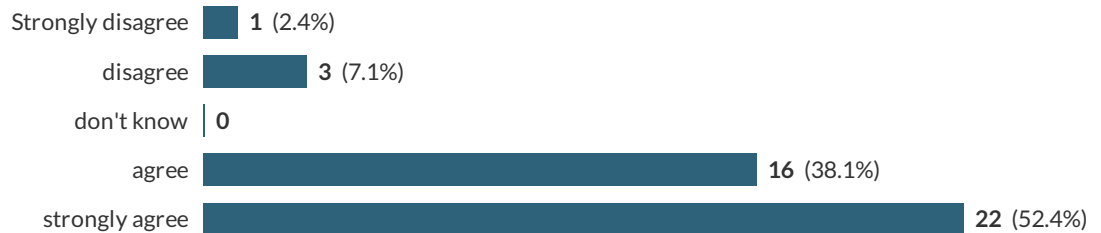

## Section 6: Barriers to providing foot health education

**15** To what extent do you agree with the following statements? Select one response for each item.

**15.1** There is enough time during consultations to provide foot health education

**15.1.a** There is enough time during consultations to provide foot health education - Please select from Strongly Agree to Strongly Disagree for each item. If you are unsure please select 'Don't Know'. There is space in the final column for each item if you wish to add any other comment.

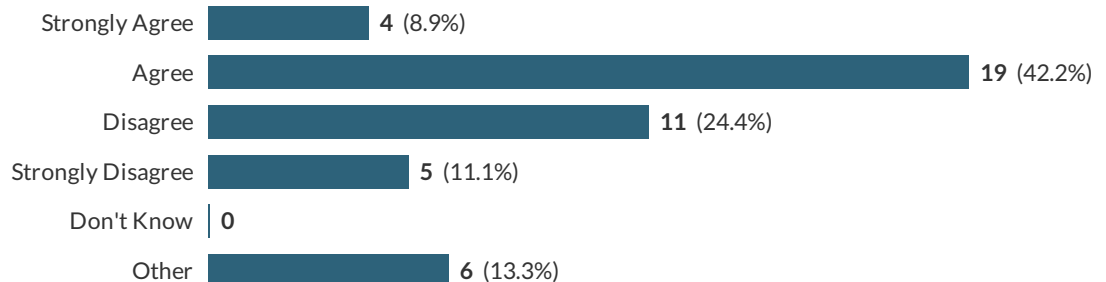

**15.1.b** There is enough time during consultations to provide foot health education - If you selected Other, please specify:

| Showing 5 of 6 responses                                                                                                                                                                                                                      |                                       |
|-----------------------------------------------------------------------------------------------------------------------------------------------------------------------------------------------------------------------------------------------|---------------------------------------|
| there can be enough time for small, focused, discussions on a particular area of health edcaution. there is not enough time to engage with the patient and determine THEIR individual fears,especations                                       | <a href="#">120812-120806-6760689</a> |
| talk while your working                                                                                                                                                                                                                       | <a href="#">120812-120806-6760696</a> |
| This depends on how services have been set up. I am lucky enough to have a set up that allows time to explain, educate and negotiate. I would say however that podiatry services have very little time and resource for foot health education | <a href="#">120812-120806-6760697</a> |
| We are always under pressure for time but foot health education should be made a priority.                                                                                                                                                    | <a href="#">120812-120806-6760707</a> |
| caseloads, overbooking lateness, extras put enormous pressure on clinical appointments                                                                                                                                                        | <a href="#">120812-120806-6760711</a> |

15.2 You have access to RA-specific foot health information such as leaflets, provided either by your Trust or from Patient support organisations such as NRAS or Arthritis Research UK

15.2.a You have access to RA-specific foot health information such as leaflets, provided either by your Trust or from Patient support organisations such as NRAS or Arthritis Research UK - Please select from Strongly Agree to Strongly Disagree for each item. If you are unsure please select 'Don't Know'. There is space in the final column for each item if you wish to add any other comment.

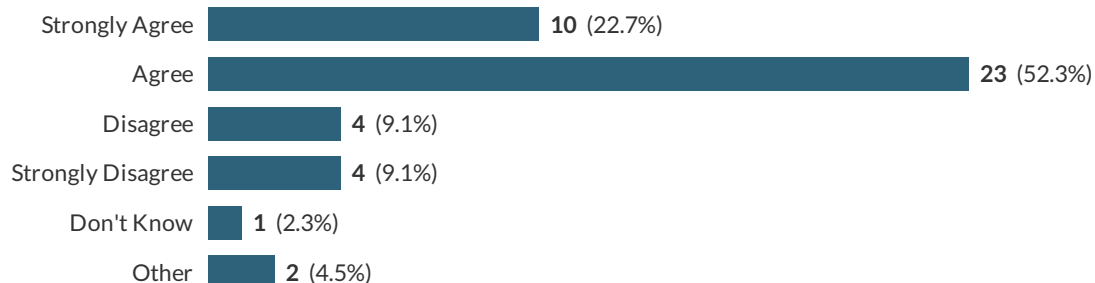

15.2.b You have access to RA-specific foot health information such as leaflets, provided either by your Trust or from Patient support organisations such as NRAS or Arthritis Research UK - If you selected Other, please specify:

| Showing all 2 responses                                                           |                                       |
|-----------------------------------------------------------------------------------|---------------------------------------|
| I have a limited supply from NRAS and the trust does not provide health leaflets. | <a href="#">120812-120806-6760707</a> |
| Trust ones currently being developed. just provide ARC leaflets at moment         | <a href="#">120812-120806-6760716</a> |

15.3 You are aware of any Group Education programmes that you could refer your patients into

15.3.a You are aware of any Group Education programmes that you could refer your patients into - Please select from Strongly Agree to Strongly Disagree for each item. If you are unsure please select 'Don't Know'. There is space in the final column for each item if you wish to add any other comment.

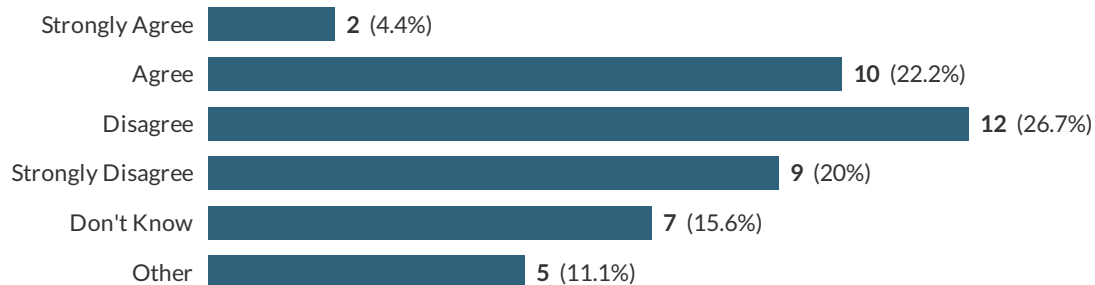

- 15.3.b You are aware of any Group Education programmes that you could refer your patients into - If you selected Other, please specify:

| Showing all 5 responses                                                                                                                                     |                                       |
|-------------------------------------------------------------------------------------------------------------------------------------------------------------|---------------------------------------|
| not for RA in particula- we have 'pain management, long term conditions' sessions                                                                           | <a href="#">120812-120806-6760689</a> |
| Decision was made to discontinue group sessions although do use fibromyalgia group sessions for those RA who have a fibromyalgic component in their disease | <a href="#">120812-120806-6760694</a> |
| Arthritis care Groups - some don't do groups but they work if they do them.                                                                                 | <a href="#">120812-120806-6760696</a> |
| Although not specific to Rheumatoid Arthritis                                                                                                               | <a href="#">120812-120806-6760707</a> |
| only for those with consultant in area not for those will cross boundary care                                                                               | <a href="#">120812-120806-6760716</a> |

- 15.4 You have enough knowledge about how RA effects the feet in order to provide effective foot health education

- 15.4.a You have enough knowledge about how RA effects the feet in order to provide effective foot health education - Please select from Strongly Agree to Strongly Disagree for each item. If you are unsure please select 'Don't Know'. There is space in the final column for each item if you wish to add any other comment.

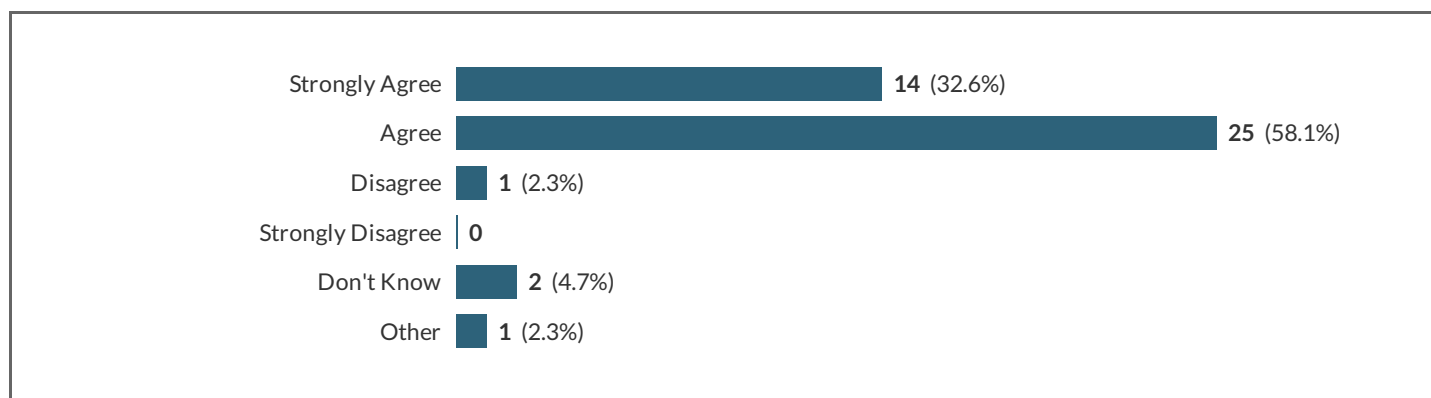

- 15.4.b You have enough knowledge about how RA effects the feet in order to provide effective foot health education - If you selected Other, please specify:

| Showing 1 response                                                                                                                                                                                                                                                                  |                                       |
|-------------------------------------------------------------------------------------------------------------------------------------------------------------------------------------------------------------------------------------------------------------------------------------|---------------------------------------|
| RA can be very distructive to the foot joints and I am unsure as to which extend suitable footwear can prevent problems. When problems do occur, RA patients in particular, are very good at finding ways to relief their symptoms. They are more receptive at that stage, I think. | <a href="#">120812-120806-6760698</a> |

- 15.5 The people that you manage with RA use the foot health education that you provide

- 15.5.a The people that you manage with RA use the foot health education that you provide - Please select from Strongly Agree to Strongly Disagree for each item. If you are unsure please select 'Don't Know'. There is space in the final column for each item if you wish to add any other comment.

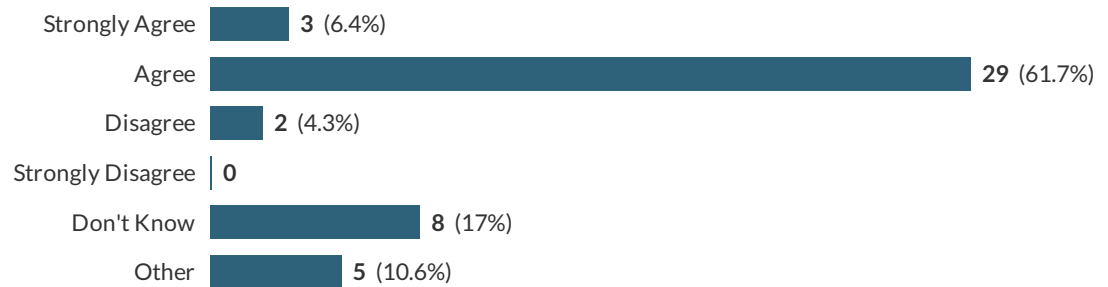

**15.5.b** The people that you manage with RA use the foot health education that you provide - If you selected Other, please specify:

| Showing all 5 responses                                                                                                       |                                       |
|-------------------------------------------------------------------------------------------------------------------------------|---------------------------------------|
| other than some female patients and footwear advice                                                                           | <a href="#">120812-120806-6760694</a> |
| Over time, not straight away.                                                                                                 | <a href="#">120812-120806-6760698</a> |
| Some do, some don't                                                                                                           | <a href="#">120812-120806-6760700</a> |
| Sometimes.                                                                                                                    | <a href="#">120812-120806-6760707</a> |
| in the main yes but they have gross foot deformity due to RA for many years and sometimes object to styles of shoes available | <a href="#">120812-120806-6760716</a> |

**16** If people with RA DO NOT use the foot health education that you provide, is this because (please select all that apply)...

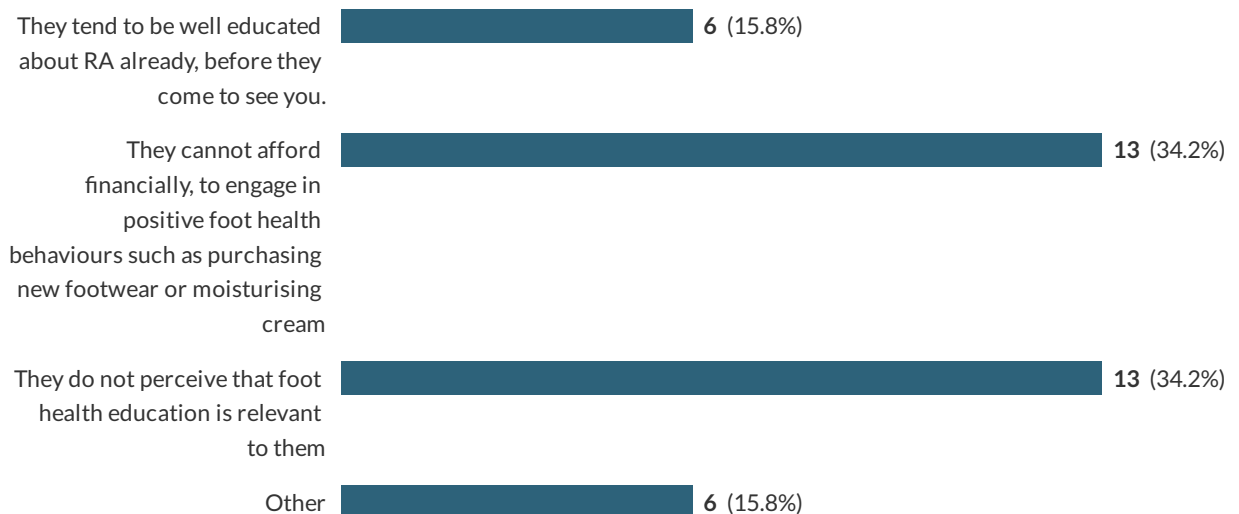

16.a If you selected Other, please specify:

| Showing 5 of 6 responses                                                                                                                                                                                                                                                                                                                       |                                       |
|------------------------------------------------------------------------------------------------------------------------------------------------------------------------------------------------------------------------------------------------------------------------------------------------------------------------------------------------|---------------------------------------|
| they are unable to due to physical constraints and lack of help by others                                                                                                                                                                                                                                                                      | <a href="#">120812-120806-6760695</a> |
| some do some don't - barriers are cost, motivation - it won't happen to me or I know that but it's too late or just too much bother. Until it happens.                                                                                                                                                                                         | <a href="#">120812-120806-6760696</a> |
| People find it generally difficult to alter behaviours and this includes changing footwear type. This is more of a proble with women rather than with men. Additionally, elderly people can find that social barriers hinders them from wearing trainer-type shoes but don't want to wear 'shoes for old people' either.                       | <a href="#">120812-120806-6760698</a> |
| Often receptiveness to HE relates to symptom only. People experiencing foot pain can appreciate the relevance and use of FHE. Often the newly diagnosed without foot pain can't see the relevance to them and disregard it. FHE is best given at all opportunities but I think best received when the person given FHE has a personal interest | <a href="#">120812-120806-6760705</a> |
| Excuses I hear most often:<br>They are young and do not want to wear certain shoe types.<br>Their occupation dictates a shoe type.<br>Only flip flops are comfortable.<br>'They might not be good for me but they're comfortable!'                                                                                                             | <a href="#">120812-120806-6760707</a> |

17 This free text box is for you to add any additional comments or information that you feel is relevant and has not been addressed by this survey. Thank you.

| Showing 5 of 13 responses                                                                                                                                                                                                                                  |                                       |
|------------------------------------------------------------------------------------------------------------------------------------------------------------------------------------------------------------------------------------------------------------|---------------------------------------|
| Section 2 Q8 titles appear to have a typo as both ends of the scale are strongly disagree. I meant strongly AGREE for my response.<br>Good luck,                                                                                                           | <a href="#">120812-120806-6760685</a> |
| Re timing, foot health education is important in early diagnosis but patients are often overwhelmed with new information at this time and therefore foot health education is perhaps best delivered as part of a staggered education approach by the team. | <a href="#">120812-120806-6760686</a> |
| Section number 2 has choices wrong both strongly disagree                                                                                                                                                                                                  | <a href="#">120812-120806-6760687</a> |
| A barrier to the impotence of foot health education is the foot involvement in RA is not given the same priority (by the MDT) as other aspects of care.                                                                                                    | <a href="#">120812-120806-6760691</a> |
| Working in the private sector I have to refer them into the NHS anyway, it would be immoral not to.                                                                                                                                                        | <a href="#">120812-120806-6760696</a> |
